# Supplementary material for: Antibiotic treatment of Chlamydia-induced cystitis in the koala is linked to expression of key inflammatory genes in reactive oxygen pathways
Source: PubMed Central journal article supplement (PMC6695219; doi:10.1371/journal.pone.0221109), 2019-08-15
Supplement: pone.0221109.s001.pdf [file pone.0221109.s001.pdf]

### Male Koala 1, bladder images

Baseline

Week 2

Week 4

Week 6

Week 8

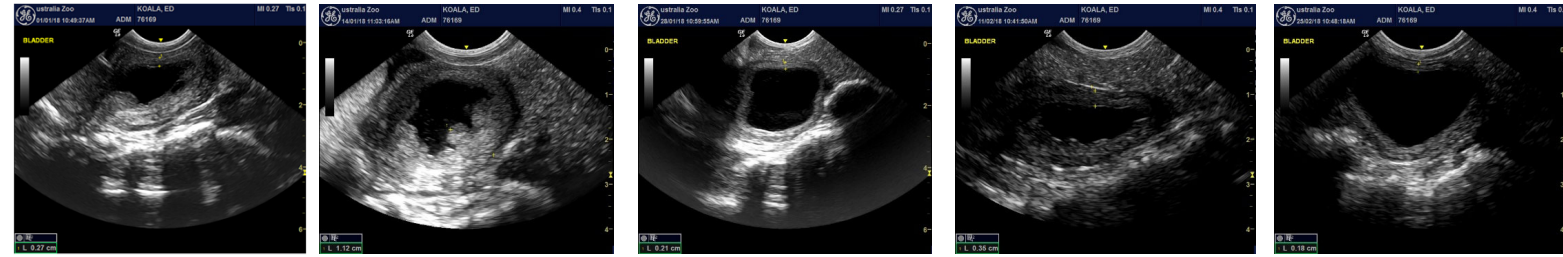

### Male Koala 2, bladder images

Baseline

Week 2

Week 4

Week 6

Week 8

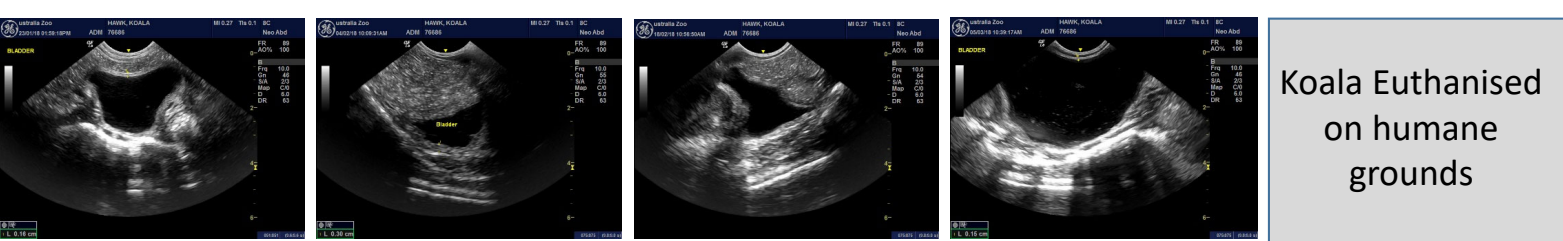

### Female koala 1, bladder images

Baseline

Week 2

Week 4

Week 6

Week 8

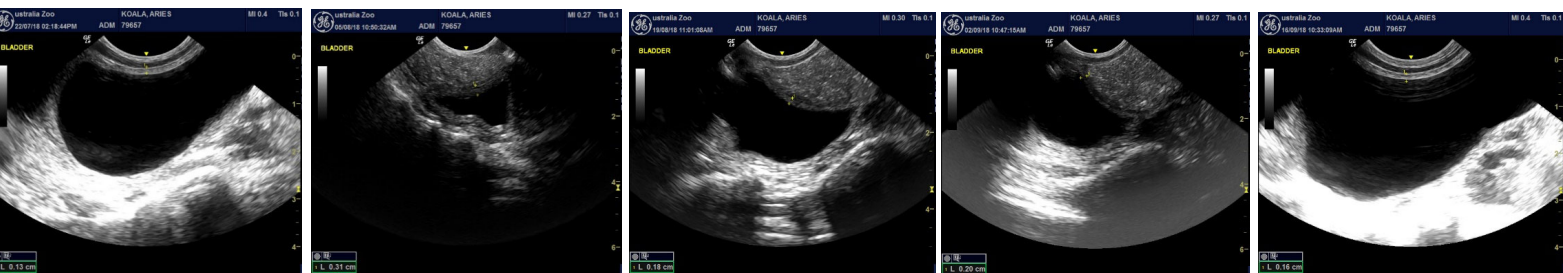

### Female Koala 2, bladder images

Baseline

Week 2

Week 4

Week 6

Week 8

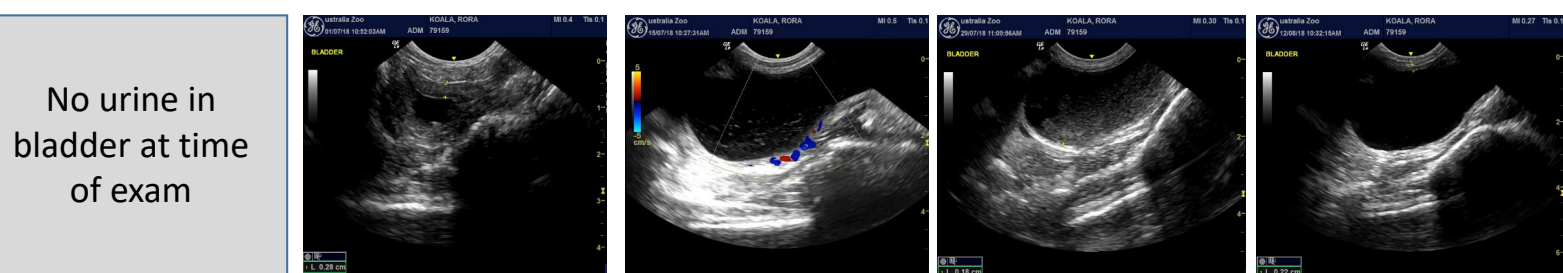

### Female Koala 3, bladder images

Baseline

Week 2

Week 4

Week 6

Week 8

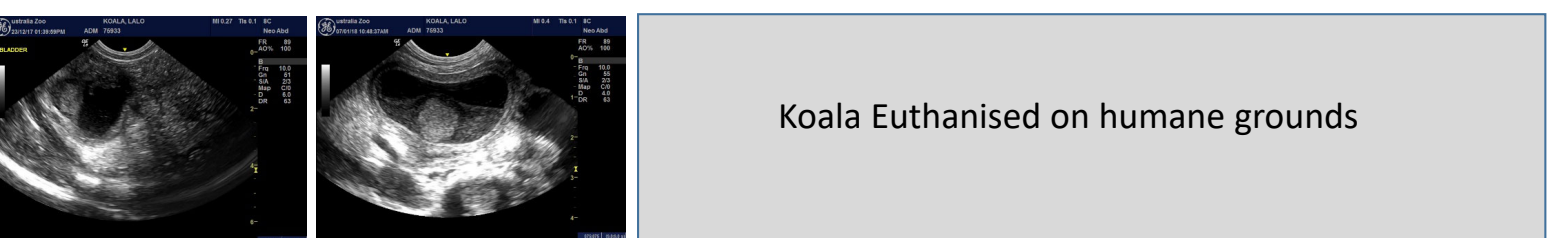

Supplementary figure 1. Ultrasound images of the bladder for each koala at every time point
