# Supplementary material for: Antibiotic treatment of Chlamydia-induced cystitis in the koala is linked to expression of key inflammatory genes in reactive oxygen pathways
Source: PubMed Central journal article supplement (PMC6695219; doi:10.1371/journal.pone.0221109), 2019-08-15
Supplement: pone.0221109.s003.pdf [file pone.0221109.s003.pdf]

Supplementary table 2. Differentially expressed genes between each time point with corresponding kegg number (KO#), log fold change (logFC), log count per million (logCPM), F value (F), P value (PValue), false discovery rate adjusted P value (FDR), Predicted protein (function) and the koala reference genome location number (LOC#)

| Admission (week 0) to End of Antibiotics (Week 4) |        |          |          |          |          |          |              | End of Antibiotics (Week 4) to Release (Week 8) |         |        |          |          |          |          |          |             |              |
|---------------------------------------------------|--------|----------|----------|----------|----------|----------|--------------|-------------------------------------------------|---------|--------|----------|----------|----------|----------|----------|-------------|--------------|
| genes                                             | KO#    | logFC    | logCPM   | F        | PValue   | FDR      | function     | LOC#                                            | genes   | KO#    | logFC    | logCPM   | F        | PValue   | FDR      | function    | LOC#         |
| LOXL4                                             | K00280 | 6.560337 | 4.344205 | 7.906544 | 0.004927 | 0.437841 |              |                                                 | AOX1    | K00157 | -10.5916 | 3.210946 | 7.680883 | 0.005582 | 0.419336 |             |              |
| FMO6P                                             | K00485 | 9.559361 | 2.506135 | 7.601086 | 0.005835 | 0.469427 | putative di  | LOC110196                                       | LOXL4   | K00280 | -12.0633 | 4.344205 | 12.91232 | 0.000327 | 0.169623 |             |              |
| CHST11                                            | K01017 | 8.904431 | 4.109732 | 10.82447 | 0.001002 | 0.271327 |              |                                                 | GALNT9  | K00710 | -10.5919 | 3.038824 | 7.36872  | 0.006638 | 0.442037 |             |              |
| RNASE6                                            | K01172 | -11.474  | 4.791521 | 7.926453 | 0.004873 | 0.437504 | ribonuclea:  | LOC110206                                       | DGKB    | K00901 | -11.4127 | 3.746671 | 9.747462 | 0.001796 | 0.313216 |             |              |
| PGLYRP2                                           | K01446 | -6.17224 | 8.165478 | 9.8775   | 0.001674 | 0.350116 |              |                                                 | LPL     | K01059 | -10.8502 | 3.517634 | 8.567023 | 0.003424 | 0.385571 |             |              |
| FPR2                                              | K04173 | -11.8428 | 5.107725 | 9.11842  | 0.002531 | 0.37908  | formyl pep   | LOC110215                                       | INPP5J  | K01106 | -10.442  | 3.22727  | 7.572204 | 0.005929 | 0.419336 |             |              |
| CCKBR                                             | K04195 | 10.9645  | 3.385968 | 10.75991 | 0.001038 | 0.271327 |              |                                                 | C2      | K01332 | -10.2738 | 4.199803 | 9.711218 | 0.001832 | 0.313216 |             |              |
| ADORA2B                                           | K04267 | -11.7749 | 5.132563 | 9.099536 | 0.002558 | 0.37908  |              |                                                 | PGLYRP2 | K01446 | 5.415421 | 8.165478 | 8.021899 | 0.004623 | 0.406923 |             |              |
| MAPT                                              | K04380 | 8.217309 | 4.004936 | 9.333425 | 0.002251 | 0.37908  |              |                                                 | AZIN2   | K01583 | -7.68087 | 5.082959 | 9.456211 | 0.002105 | 0.327986 | antizyme ir | LOC110206237 |
| CAMK2B                                            | K04515 | 5.759141 | 4.799363 | 7.678084 | 0.005591 | 0.467981 |              |                                                 | A4GALT  | K01988 | -6.95796 | 4.663959 | 6.644289 | 0.009949 | 0.488371 |             |              |
| IL1B                                              | K04519 | -6.70047 | 9.867449 | 12.23797 | 0.000469 | 0.213505 |              |                                                 | IL4I1   | K03334 | -5.4257  | 5.55691  | 6.978822 | 0.00825  | 0.465433 |             |              |
| ADGRE1                                            | K04591 | -5.69382 | 8.742069 | 9.267824 | 0.002333 | 0.37908  |              |                                                 | SKP2    | K03875 | -10.5159 | 2.896064 | 7.069128 | 0.007844 | 0.451199 |             |              |
| ADGRB3                                            | K04598 | 8.960652 | 4.518575 | 13.01208 | 0.00031  | 0.168425 |              |                                                 | A2M     | K03910 | -10.2038 | 2.767364 | 6.692241 | 0.009685 | 0.482388 |             |              |
| AMH                                               | K04665 | 9.344645 | 3.319405 | 8.655523 | 0.003262 | 0.385212 |              |                                                 | OPRL1   | K04216 | -11.0601 | 3.557328 | 8.873571 | 0.002894 | 0.371241 |             |              |
| SOCS3                                             | K04696 | -5.04184 | 9.672381 | 8.218499 | 0.004148 | 0.409656 |              |                                                 | PTGER2  | K04259 | -10.4415 | 3.446012 | 8.00102  | 0.004676 | 0.406923 |             |              |
| IRAK2                                             | K04731 | -5.45693 | 8.376339 | 8.569838 | 0.003419 | 0.385212 |              |                                                 | gpr35   | K04276 | -5.28902 | 5.517227 | 6.622234 | 0.010073 | 0.489235 | G-protein c | LOC110198099 |
| CHST12                                            | K04742 | 5.554003 | 5.126201 | 7.978463 | 0.004735 | 0.437504 |              |                                                 | RASGRF1 | K04349 | -11.0806 | 3.488664 | 8.735097 | 0.003122 | 0.378659 |             |              |
| TRPV5                                             | K04974 | 10.04719 | 2.644449 | 8.258624 | 0.004057 | 0.407767 |              |                                                 | ADGRB3  | K04598 | -12.2596 | 4.518575 | 14.05638 | 0.000178 | 0.120696 |             |              |
| KCNJ12                                            | K05005 | 7.980121 | 3.95335  | 8.815561 | 0.002988 | 0.383229 | ATP-sensiti  | LOC110223                                       | THBS2   | K04659 | -11.3636 | 3.747881 | 9.697218 | 0.001846 | 0.313216 |             |              |
| CXCR2                                             | K05050 | -5.89779 | 7.197474 | 8.467994 | 0.003615 | 0.390156 |              |                                                 | AMH     | K04665 | -11.0636 | 3.319405 | 8.340876 | 0.003877 | 0.399392 |             |              |
| CSF3R                                             | K05061 | -6.78302 | 11.15352 | 13.23992 | 0.000274 | 0.162111 |              |                                                 | SOCS3   | K04696 | 5.042751 | 9.672381 | 8.021253 | 0.004624 | 0.406923 |             |              |
| GRIN2B                                            | K05210 | 8.787381 | 4.733966 | 13.44169 | 0.000246 | 0.158879 |              |                                                 | CHRNA2  | K04804 | -6.99967 | 5.954603 | 9.960955 | 0.0016   | 0.31032  |             |              |
| NRG3                                              | K05457 | 10.27636 | 2.711327 | 8.578579 | 0.003402 | 0.385212 |              |                                                 | CACNA1C | K04850 | -5.11671 | 5.612054 | 6.59043  | 0.010255 | 0.489235 |             |              |
| IL1RN                                             | K05481 | -5.91344 | 10.18357 | 10.54362 | 0.001166 | 0.299228 |              |                                                 | CACNA1I | K04856 | -9.11419 | 3.96535  | 7.747774 | 0.005379 | 0.419336 |             |              |
| TGM1                                              | K05619 | -5.40294 | 8.067633 | 8.212708 | 0.004161 | 0.409656 |              |                                                 | KCNK13  | K04922 | -11.3965 | 3.744749 | 9.723571 | 0.00182  | 0.313216 |             |              |
| VIL1                                              | K05761 | 7.710396 | 3.950035 | 8.409853 | 0.003733 | 0.393462 |              |                                                 | KCNN1   | K04942 | -10.6468 | 3.410949 | 8.131028 | 0.004352 | 0.406923 |             |              |
| PLCD4                                             | K05857 | 5.718047 | 4.891227 | 7.825351 | 0.005153 | 0.44628  |              |                                                 | KCNJ12  | K05005 | -11.692  | 3.95335  | 10.77001 | 0.001032 | 0.268071 | ATP-sensiti | LOC110223210 |
| SPTBN5                                            | K06115 | 5.474314 | 5.494331 | 8.950701 | 0.002774 | 0.381054 |              |                                                 | CLIC4   | K05024 | 6.745639 | 6.400656 | 8.346434 | 0.003865 | 0.399392 |             |              |
| CD33                                              | K06473 | -5.64459 | 8.009557 | 8.651667 | 0.003269 | 0.385212 | myeloid ce   | LOC110220                                       | ABCC8   | K05032 | -10.4736 | 3.032401 | 7.253436 | 0.007078 | 0.442037 |             |              |
| SPN                                               | K06477 | -5.62813 | 8.711057 | 9.075118 | 0.002592 | 0.37908  |              |                                                 | SLC6A17 | K05048 | -8.948   | 4.240739 | 8.491492 | 0.003569 | 0.385571 |             |              |
| NECTIN2                                           | K06531 | -5.16626 | 7.908332 | 7.628121 | 0.005748 | 0.467981 | nectin-2     | LOC110215                                       | NMUR1   | K05052 | -10.8373 | 3.10633  | 7.710571 | 0.005491 | 0.419336 |             |              |
| TMEM233                                           | K06566 | -6.15284 | 7.415103 | 9.074478 | 0.002593 | 0.37908  | dispanin su  | LOC110203                                       | CSF3R   | K05061 | 5.537437 | 11.15352 | 9.820072 | 0.001727 | 0.313216 |             |              |
| IFITM2                                            | K06566 | -6.81617 | 7.84318  | 10.9367  | 0.000943 | 0.271327 | interferon-  | LOC110202                                       | PDGFRB  | K05089 | -11.0902 | 3.511122 | 8.796661 | 0.003019 | 0.376562 |             |              |
| VCAN                                              | K06793 | -5.64795 | 11.5588  | 10.50339 | 0.001192 | 0.30015  |              |                                                 | FLT1    | K05096 | -10.4414 | 3.479376 | 8.070282 | 0.004501 | 0.406923 |             |              |
| SEMA3D                                            | K06840 | 6.856967 | 4.372712 | 8.523796 | 0.003506 | 0.385212 |              |                                                 | FLT4    | K05097 | -6.08894 | 5.005001 | 6.949418 | 0.008386 | 0.466414 |             |              |
| SRGN                                              | K06849 | -5.4661  | 10.0283  | 9.379717 | 0.002195 | 0.37908  |              |                                                 | GRIN2C  | K05211 | -10.3785 | 2.817897 | 6.879824 | 0.008719 | 0.466956 |             |              |
| CYP2B11                                           | K07412 | 10.51727 | 2.827089 | 8.978343 | 0.002733 | 0.379163 | cytochrom    | LOC110198                                       | CCL3    | K05408 | -8.19786 | 4.566051 | 8.060129 | 0.004526 | 0.406923 | C-C motif c | LOC110192261 |
| SRGAP3                                            | K07526 | 9.819184 | 4.61679  | 14.9211  | 0.000112 | 0.127119 |              |                                                 | CXCL9   | K05416 | -10.3095 | 3.491648 | 7.962891 | 0.004776 | 0.410497 |             |              |
| KRT85                                             | K07605 | 10.35428 | 2.612397 | 8.56467  | 0.003428 | 0.385212 | keratin, tyf | LOC110194                                       | GDNF    | K05452 | -9.95643 | 4.171471 | 9.358149 | 0.002221 | 0.328202 |             |              |
| B3GNT4                                            | K07971 | 9.109081 | 3.197174 | 8.075417 | 0.004488 | 0.419449 |              |                                                 | SLC1A3  | K05614 | -10.3452 | 2.830787 | 6.863069 | 0.008801 | 0.466956 |             |              |

|          |        |          |          |          |          |          |               |           |          |          |          |          |          |                                     |          |
|----------|--------|----------|----------|----------|----------|----------|---------------|-----------|----------|----------|----------|----------|----------|-------------------------------------|----------|
| FCER1G   | K07983 | -7.42538 | 9.419039 | 13.69912 | 0.000215 | 0.157612 |               | ABCA12    | K05646   | -10.705  | 4.416835 | 11.22192 | 0.000809 | 0.255336                            |          |
| NCF1     | K08011 | -5.04173 | 9.984292 | 8.352496 | 0.003853 | 0.396846 |               | ABCB1     | K05658   | -7.96688 | 3.92795  | 6.546955 | 0.010508 | 0.491544                            |          |
| CCRL2    | K08373 | -7.96305 | 7.817002 | 12.90933 | 0.000327 | 0.171082 |               | PLCB1     | K05858   | -11.2275 | 3.508522 | 8.930664 | 0.002805 | 0.365774                            |          |
| P2RY13   | K08388 | -12.4461 | 5.732757 | 11.69771 | 0.000626 | 0.218276 |               | SPTBN5    | K06115   | -11.1545 | 5.494331 | 17.06523 | 3.62E-05 | 0.050562                            |          |
| HCAR2    | K08402 | -6.71016 | 9.534761 | 12.05079 | 0.000518 | 0.213505 |               | COL1A1    | K06236   | -11.6073 | 4.079409 | 11.133   | 0.000848 | 0.255336                            |          |
| GPR26    | K08411 | 10.77781 | 3.196777 | 10.03228 | 0.001539 | 0.340732 |               | COL1A2    | K06236   | -9.97986 | 3.932976 | 8.442404 | 0.003667 | 0.392234                            |          |
| TTBK1    | K08815 | 7.026107 | 4.707751 | 10.01452 | 0.001554 | 0.340732 |               | COL4A5    | K06237   | -10.2403 | 2.895367 | 6.830432 | 0.008963 | 0.466956                            |          |
| MYO3A    | K08834 | 10.24849 | 4.251535 | 13.48367 | 0.000241 | 0.158879 |               | Col6a4    | K06238   | -8.60087 | 4.760025 | 9.927771 | 0.001629 | 0.31032 collagen alj LOC110209064   |          |
| NEK5     | K0885  | 10.64744 | 3.12126  | 9.693484 | 0.00185  | 0.364531 |               | COL6A5    | K06238   | -11.548  | 5.216768 | 15.89054 | 6.72E-05 | 0.062065                            |          |
| ZNF561   | K09228 | 10.01635 | 2.7831   | 8.371638 | 0.003812 | 0.396846 | zinc finger   | LOC110193 | HSPG2    | K06255   | -6.16622 | 5.367191 | 8.033592 | 0.004593                            | 0.406923 |
| ZNF251   | K09228 | 10.37125 | 2.884721 | 8.870463 | 0.002899 | 0.383229 | zinc finger   | LOC110214 | CD36     | K06259   | -9.61149 | 3.793938 | 7.885547 | 0.004984                            | 0.410738 |
| SOX8     | K09270 | 11.22753 | 3.514473 | 11.49412 | 0.000698 | 0.231646 |               | SPN       | K06477   | 4.99688  | 8.711057 | 7.461855 | 0.006303 | 0.43506                             |          |
| SPI1     | K09438 | -6.73339 | 8.443892 | 11.26687 | 0.000789 | 0.245861 |               | IGSF1     | K06512   | -10.9645 | 3.390446 | 8.398956 | 0.003755 | 0.395827 immunoglob LOC110220196    |          |
| IL8      | K10030 | -5.81208 | 10.46498 | 10.41732 | 0.001249 | 0.308747 |               | SIGLEC14  | K06549   | 6.137406 | 6.321071 | 7.243157 | 0.007119 | 0.442037 sialic acid-t LOC110219799 |          |
| ZBTB16   | K10055 | 8.273379 | 3.993338 | 9.385166 | 0.002188 | 0.37908  |               | IFITM2    | K06566   | 5.392642 | 7.84318  | 7.679939 | 0.005585 | 0.419336 interferon- LOC110202976   |          |
| CLEC4E   | K10059 | -5.93611 | 7.598522 | 8.926431 | 0.002812 | 0.382289 |               | PLK1      | K06631   | -10.4736 | 3.029845 | 7.248995 | 0.007096 | 0.442037                            |          |
| TBX2     | K10176 | 11.52817 | 3.968449 | 13.65123 | 0.00022  | 0.157612 |               | BTNL2     | K06712   | -10.3543 | 2.612397 | 6.689689 | 0.009699 | 0.482388 butyrophili LOC110194075   |          |
| MYH11    | K10352 | 5.33005  | 5.180803 | 7.737762 | 0.005409 | 0.459665 |               | BTNL2     | K06712   | -9.91654 | 2.987605 | 6.693712 | 0.009677 | 0.482388 butyrophili LOC110210621   |          |
| MYO15A   | K10361 | 6.002619 | 5.191853 | 9.362354 | 0.002216 | 0.37908  |               | CNTN5     | K06763   | -11.2782 | 3.663981 | 9.3612   | 0.002217 | 0.328202                            |          |
| ANK2     | K10380 | 7.141117 | 5.491942 | 13.36105 | 0.000257 | 0.158879 |               | IGLON5    | K06773   | -10.6472 | 2.94746  | 7.259304 | 0.007055 | 0.442037                            |          |
| KIF26B   | K10404 | 7.445518 | 4.771352 | 11.10804 | 0.00086  | 0.259831 |               | ACAN      | K06792   | -11.3794 | 4.175631 | 11.22656 | 0.000807 | 0.255336                            |          |
| DNAH5    | K10408 | 6.995315 | 4.454639 | 9.120803 | 0.002528 | 0.37908  |               | VCAN      | K06793   | 4.410334 | 11.5588  | 7.145158 | 0.007518 | 0.448864                            |          |
| MAP1B    | K10429 | 6.189529 | 4.47826  | 7.655482 | 0.005661 | 0.467981 |               | SLIT1     | K06838   | -10.8026 | 3.15152  | 7.763511 | 0.005332 | 0.419336                            |          |
| MCM9     | K10738 | 10.82669 | 3.306542 | 10.36466 | 0.001285 | 0.312004 | DNA helica    | LOC110197 | SEMA3E   | K06840   | -10.3112 | 2.771378 | 6.784401 | 0.009197                            | 0.470142 |
| MMD2     | K11064 | 11.27823 | 3.61357  | 11.86008 | 0.000574 | 0.216717 |               | SRGN      | K06849   | 4.569121 | 10.0283  | 7.043432 | 0.007957 | 0.454596                            |          |
| CUL9     | K11970 | 9.125404 | 4.479951 | 13.0726  | 0.0003   | 0.168425 | cullin-9      | LOC110201 | SLIT3    | K06850   | -11.635  | 4.146843 | 11.4408  | 0.000719                            | 0.255336 |
| ISG15    | K12159 | -5.50157 | 9.711829 | 9.324588 | 0.002262 | 0.37908  |               | KRT85     | K07605   | -10.2038 | 2.759364 | 6.685665 | 0.009721 | 0.482388 keratin, tyf LOC110218182  |          |
| GUCY2C   | K12320 | 10.16629 | 2.694232 | 8.439283 | 0.003673 | 0.393242 |               | GJB3      | K07622   | -11.0696 | 3.710231 | 9.260164 | 0.002343 | 0.334232                            |          |
| TTN      | K12567 | 8.465235 | 7.43488  | 25.72442 | 3.95E-07 | 0.001409 |               | ADAMTS4   | K07764   | -11.0287 | 3.484742 | 8.673609 | 0.003229 | 0.38183                             |          |
| MEFV     | K12803 | -6.46834 | 7.641027 | 9.977322 | 0.001585 | 0.342165 |               | ARL10     | K07958   | -11.3258 | 3.642058 | 9.359761 | 0.002219 | 0.328202                            |          |
| RETN     | K13438 | -11.3776 | 6.068172 | 10.86555 | 0.00098  | 0.271327 |               | B3GNT4    | K07971   | -10.9078 | 3.197174 | 7.952067 | 0.004804 | 0.410497                            |          |
| Bf-CRAMP | K13916 | -7.25115 | 11.02452 | 14.36622 | 0.000151 | 0.146251 | cathelicidin  | LOC110216 | FCER1G   | K07983   | 5.989463 | 9.419039 | 10.05558 | 0.001519                            | 0.31032  |
| Bf-CRAMP | K13916 | -5.58908 | 8.926139 | 9.159973 | 0.002474 | 0.37908  | cathelicidin  | LOC110217 | MMP17    | K07997   | -8.57593 | 3.856662 | 6.901357 | 0.008615                            | 0.466956 |
| IFIT1    | K14217 | -7.17787 | 9.145091 | 12.78489 | 0.00035  | 0.176072 | interferon-   | LOC110192 | MMP19    | K07998   | -8.33312 | 4.097498 | 7.156074 | 0.007473                            | 0.448864 |
| SLCO2B1  | K14352 | 6.732859 | 4.385307 | 8.355852 | 0.003845 | 0.396846 |               | SLC43A3   | K08230   | -10.3785 | 2.807087 | 6.870568 | 0.008764 | 0.466956                            |          |
| RPP25    | K14525 | 10.27624 | 2.796593 | 8.667593 | 0.00324  | 0.385212 |               | CCRL2     | K08373   | 6.588391 | 7.817002 | 9.722937 | 0.00182  | 0.313216                            |          |
| SLC15A5  | K14639 | 9.882867 | 2.150686 | 7.636786 | 0.00572  | 0.467981 |               | P2RY8     | K08386   | -7.92396 | 3.932478 | 6.507541 | 0.010744 | 0.498569                            |          |
| SHANK2   | K15009 | 7.14377  | 4.136195 | 8.164567 | 0.004273 | 0.409656 |               | GPR68     | K08408   | -10.506  | 3.365964 | 7.908177 | 0.004922 | 0.410738                            |          |
| SIX1     | K15614 | 10.75202 | 3.505586 | 10.80758 | 0.001011 | 0.271327 |               | GPR84     | K08421   | -4.56276 | 6.896508 | 7.122178 | 0.007615 | 0.448864                            |          |
| MUC16    | K16145 | 10.58975 | 3.925609 | 11.96339 | 0.000543 | 0.213505 | mucin-16      | LOC110203 | ADAMTS17 | K08631   | -9.53065 | 3.498336 | 6.871573 | 0.008759                            | 0.466956 |
| RGS18    | K16449 | -12.2421 | 5.522225 | 10.78979 | 0.001021 | 0.271327 |               | SBK1      | K08858   | -7.71208 | 4.673417 | 8.517819 | 0.003518 | 0.385571                            |          |
| TIMP1    | K16451 | -6.04127 | 6.793091 | 8.109875 | 0.004404 | 0.418032 |               | PLK3      | K08862   | 4.920907 | 7.474183 | 6.621804 | 0.010076 | 0.489235                            |          |
| PCDHAC1  | K16493 | 10.2039  | 2.71859  | 8.505692 | 0.003541 | 0.385212 | protocadherin | LOC110220 | NPAS1    | K09098   | -10.4735 | 3.094713 | 7.36263  | 0.006661                            | 0.442037 |
| PCDHGC4  | K16497 | 4.725886 | 7.034222 | 10.03833 | 0.001534 | 0.340732 | protocadherin | LOC110220 | ZNF205   | K09228   | -11.8024 | 4.116622 | 11.53098 | 0.000685                            | 0.255336 |

|            |        |          |          |          |          |          |             |           |          |          |          |          |          |             |              |              |              |
|------------|--------|----------|----------|----------|----------|----------|-------------|-----------|----------|----------|----------|----------|----------|-------------|--------------|--------------|--------------|
| DCHS1      | K16507 | 6.322043 | 4.739979 | 8.677113 | 0.003223 | 0.385212 | ZNF345      | K09228    | -9.90902 | 3.508573 | 7.277293 | 0.006985 | 0.442037 | zinc finger | LOC110221328 |              |              |
| MAP7D3     | K16807 | 9.700666 | 11.30695 | 38.73031 | 4.89E-10 | 6.65E-06 | MAP7 dom    | LOC110196 | SPI1     | K09438   | 5.745335 | 8.443892 | 8.83758  | 0.002952    | 0.371622     |              |              |
| SPRY4      | K17385 | 8.491005 | 4.06703  | 10.01947 | 0.00155  | 0.340732 | FKBP6       | K09572    | -10.5916 | 3.175275 | 7.614962 | 0.00579  | 0.419336 |             |              |              |              |
| HOXC10     | K17444 | 10.57675 | 3.033447 | 9.419253 | 0.002148 | 0.37908  | TMPRSS9     | K09640    | -11.5341 | 3.913772 | 10.44131 | 0.001233 | 0.284101 |             |              |              |              |
| ACOD1      | K17724 | -7.63696 | 10.89394 | 15.21578 | 9.60E-05 | 0.126737 | IL8         | K10030    | 4.636594 | 10.46498 | 7.340716 | 0.006742 | 0.442037 |             |              |              |              |
| CRYM       | K18258 | 11.41103 | 3.666987 | 12.22329 | 0.000472 | 0.213505 | CLEC4F      | K10060    | -10.2761 | 2.890615 | 6.856529 | 0.008833 | 0.466956 | C-type lect | LOC110218459 |              |              |
| DYSF       | K18261 | 9.693813 | 5.572705 | 19.76606 | 8.76E-06 | 0.023832 | COLEC12     | K10062    | -8.16747 | 5.073547 | 10.01569 | 0.001553 | 0.31032  |             |              |              |              |
| NEB        | K18267 | 5.974449 | 5.169835 | 9.229383 | 0.002382 | 0.37908  | LGALS9C     | K10093    | -9.43372 | 3.649997 | 7.371513 | 0.006628 | 0.442037 | galectin-9C | LOC110192174 |              |              |
| TDRD15     | K18405 | 7.074194 | 4.285679 | 8.581732 | 0.003396 | 0.385212 | TLR9        | K10161    | -10.2761 | 2.918268 | 6.889993 | 0.00867  | 0.466956 |             |              |              |              |
| TDRD5      | K18407 | 8.099112 | 3.425609 | 7.461279 | 0.006305 | 0.48991  | MYH11       | K10352    | -11.5143 | 5.180803 | 15.85434 | 6.85E-05 | 0.062065 |             |              |              |              |
| DUSP9      | K18498 | 10.16632 | 2.677811 | 8.422761 | 0.003707 | 0.393462 | MYH7B       | K10352    | -12.4918 | 4.795777 | 15.63153 | 7.70E-05 | 0.064225 |             |              |              |              |
| TCHH       | K18626 | 5.315557 | 7.240832 | 12.55207 | 0.000396 | 0.192295 | MYO7A       | K10359    | -6.851   | 5.166146 | 8.720794 | 0.003147 | 0.378659 |             |              |              |              |
| SLF1       | K18757 | 7.037173 | 4.284279 | 8.519582 | 0.003514 | 0.385212 | MYO15A      | K10361    | -9.223   | 5.191853 | 12.65762 | 0.000374 | 0.169623 |             |              |              |              |
| SUN2       | K19347 | 12.37752 | 4.630274 | 18.93194 | 1.36E-05 | 0.026709 | SUN dom     | LOC110203 | FMN1     | K10367   | -9.74657 | 3.566068 | 7.229595 | 0.007173    | 0.442037     | formin-1     | LOC110214857 |
| JPH2       | K19530 | 10.87302 | 3.852662 | 12.12511 | 0.000498 | 0.213505 | ANK2        | K10380    | -9.74657 | 5.491942 | 10.13574 | 0.001455 | 0.309069 |             |              |              |              |
| MACF1      | K19827 | 9.329378 | 3.395018 | 8.824245 | 0.002973 | 0.383229 | microtubul  | LOC110214 | DST      | K10382   | -9.72186 | 3.224148 | 6.89865  | 0.008628    | 0.466956     | dystonin-lil | LOC110200818 |
| SYT2       | K19902 | 6.957191 | 4.246629 | 8.248969 | 0.004079 | 0.407767 | DST         | K10382    | -5.96444 | 5.065925 | 6.9377   | 0.008441 | 0.466414 | dystonin    | LOC110214423 |              |              |
| TNFAIP2    | K19989 | -6.22513 | 11.44258 | 11.94963 | 0.000547 | 0.213505 | KIF24       | K10393    | -8.88901 | 4.142827 | 8.087044 | 0.004459 | 0.406923 |             |              |              |              |
| TAGAP      | K20654 | -4.87421 | 9.034811 | 7.585355 | 0.005886 | 0.469552 | KIF2C       | K10393    | -10.3783 | 2.931444 | 6.998789 | 0.008158 | 0.462188 |             |              |              |              |
| AEBP1      | K21392 | 7.890164 | 4.069787 | 9.028078 | 0.002659 | 0.379163 | KIFC1       | K10405    | -10.9858 | 3.653626 | 9.02384  | 0.002666 | 0.355337 |             |              |              |              |
| CYBB       | K21421 | -6.06812 | 6.660558 | 7.781063 | 0.005281 | 0.453255 | cytochrom   | LOC110203 | DNAH1    | K10408   | -6.6192  | 4.764218 | 7.238908 | 0.007135    | 0.442037     |              |              |
| MYRIP      | K22237 | 11.19665 | 3.449487 | 11.25229 | 0.000796 | 0.245861 | DNAH17      | K10408    | -7.70304 | 4.9047   | 9.196265 | 0.002426 | 0.336575 |             |              |              |              |
| Pseudo     | N/A    | -5.99608 | 8.098983 | 9.527548 | 0.002025 | 0.37908  | Pseudo      | LOC110211 | MAP2     | K10430   | -8.09668 | 4.517613 | 8.586251 | 0.003388    | 0.385571     |              |              |
| uncharacte | N/A    | -5.73974 | 8.072795 | 8.866582 | 0.002905 | 0.383229 | uncharacte  | LOC110213 | KLHL5    | K10442   | -10.7935 | 3.416784 | 8.288682 | 0.00399     | 0.4019       |              |              |
| IGKC       | N/A    | -5.45843 | 8.376952 | 8.548245 | 0.00346  | 0.385212 | Ig kappa ch | LOC110202 | ZBTB47   | K10518   | -10.9406 | 4.179013 | 10.66603 | 0.001092    | 0.269878     |              |              |
| IGHA2      | N/A    | -5.16436 | 8.93868  | 8.180992 | 0.004234 | 0.409656 | immunoglob  | LOC110195 | TRIM63   | K10655   | -10.7523 | 3.367866 | 8.143273 | 0.004323    | 0.406923     |              |              |
| Pseudo     | N/A    | 5.976445 | 4.829452 | 8.069042 | 0.004504 | 0.419449 | Pseudo      | LOC110192 | GINS4    | K10735   | -10.9496 | 3.593452 | 8.844418 | 0.002941    | 0.371622     |              |              |
| Pseudo     | N/A    | 6.355792 | 6.484914 | 14.56933 | 0.000135 | 0.141404 | Pseudo      | LOC110222 | DNA2     | K10742   | -10.7011 | 3.101779 | 7.57927  | 0.005906    | 0.419336     |              |              |
| Pseudo     | N/A    | 6.498159 | 8.183468 | 18.90574 | 1.38E-05 | 0.026709 | Pseudo      | LOC110204 | RRM2     | K10808   | -9.54925 | 3.27525  | 6.836729 | 0.008932    | 0.466956     |              |              |
| uncharacte | N/A    | 6.947519 | 4.075819 | 7.54073  | 0.006033 | 0.476945 | uncharacte  | LOC110216 | ASXL3    | K11471   | -11.4287 | 3.743073 | 9.753664 | 0.00179     | 0.313216     |              |              |
| uncharacte | N/A    | 7.344245 | 4.175125 | 8.617278 | 0.003331 | 0.385212 | uncharacte  | LOC110214 | CENPE    | K11498   | -9.09729 | 4.804953 | 10.74913 | 0.001044    | 0.268071     |              |              |
| Pseudo     | N/A    | 7.762366 | 3.985594 | 8.605374 | 0.003353 | 0.385212 | Pseudo      | LOC110202 | CENPF    | K11499   | -9.03182 | 5.20905  | 10.81542 | 0.001007    | 0.268071     |              |              |
| uncharacte | N/A    | 7.831026 | 8.700448 | 25.62924 | 4.15E-07 | 0.001409 | uncharacte  | LOC110204 | SGO2     | K11581   | -10.4738 | 2.951746 | 7.114699 | 0.007647    | 0.448864     |              |              |
| Pseudo     | N/A    | 8.163014 | 4.228648 | 10.16582 | 0.001431 | 0.335524 | Pseudo      | LOC110197 | ISG15    | K12159   | 5.735535 | 9.711829 | 9.677633 | 0.001866    | 0.313216     |              |              |
| Pseudo     | N/A    | 8.553402 | 3.375712 | 7.891769 | 0.004967 | 0.438187 | Pseudo      | LOC110216 | HECW1    | K12167   | -12.0912 | 4.557909 | 13.95468 | 0.000187    | 0.120867     |              |              |
| uncharacte | N/A    | 9.008606 | 9.003446 | 31.54293 | 1.96E-08 | 0.000133 | uncharacte  | LOC110204 | GUCY1A2  | K12318   | -11.7657 | 4.737209 | 14.17347 | 0.000167    | 0.119383     |              |              |
| Pseudo     | N/A    | 9.1945   | 3.260902 | 8.316794 | 0.003929 | 0.401678 | Pseudo      | LOC110216 | MRV1     | K12337   | -11.6352 | 4.013074 | 10.91873 | 0.000952    | 0.268071     |              |              |
| uncharacte | N/A    | 9.55104  | 5.12833  | 17.32221 | 3.16E-05 | 0.053674 | uncharacte  | LOC110217 | NEU4     | K12357   | -10.7079 | 3.124378 | 7.626992 | 0.005751    | 0.419336     |              |              |
| uncharacte | N/A    | 9.723698 | 2.578008 | 7.842571 | 0.005104 | 0.444883 | uncharacte  | LOC110205 | MYBPC2   | K12558   | -9.89037 | 3.662679 | 7.587741 | 0.005878    | 0.419336     |              |              |
| Pseudo     | N/A    | 9.807812 | 2.223046 | 7.628339 | 0.005747 | 0.467981 | Pseudo      | LOC110206 | TTN      | K12567   | -7.51108 | 7.43488  | 16.87738 | 3.99E-05    | 0.050562     |              |              |
| uncharacte | N/A    | 9.915801 | 3.912245 | 11.32691 | 0.000764 | 0.245861 | uncharacte  | LOC110215 | MYBPC3   | K12568   | -11.1485 | 4.64868  | 12.83508 | 0.00034     | 0.169623     |              |              |
| uncharacte | N/A    | 9.95368  | 2.224928 | 7.774453 | 0.0053   | 0.453255 | uncharacte  | LOC110215 | ISG20    | K12579   | 4.620998 | 9.11343  | 6.851008 | 0.008861    | 0.466956     |              |              |
| uncharacte | N/A    | 10.04735 | 2.544398 | 8.16224  | 0.004278 | 0.409656 | uncharacte  | LOC110206 | CCL4     | K12964   | -10.175  | 2.604589 | 6.538842 | 0.010556    | 0.49155      | C-C motif c  | LOC110221243 |
| Pseudo     | N/A    | 10.41073 | 2.995023 | 9.128699 | 0.002517 | 0.37908  | Pseudo      | LOC110203 | CELF6    | K13207   | -7.05622 | 4.813629 | 7.889696 | 0.004973    | 0.410738     |              |              |

|            |       |          |          |          |          |          |             |           |          |        |          |          |          |          |          |
|------------|-------|----------|----------|----------|----------|----------|-------------|-----------|----------|--------|----------|----------|----------|----------|----------|
| uncharacte | N/A   | 10.47393 | 2.886102 | 8.988631 | 0.002717 | 0.379163 | uncharacte  | LOC110205 | ABHD1    | K13696 | -10.5633 | 3.020914 | 7.311952 | 0.006851 | 0.442037 |
| uncharacte | N/A   | 10.60517 | 2.884832 | 9.142639 | 0.002498 | 0.37908  | uncharacte  | LOC110215 | PIP5K1L  | K13712 | -11.0477 | 4.288221 | 11.24469 | 0.000799 | 0.255336 |
| PLAC8      | No KO | -8.16638 | 7.04413  | 11.74385 | 0.000611 | 0.218276 |             |           | BEST1    | K13878 | -10.0663 | 3.554951 | 7.844669 | 0.005098 | 0.415097 |
| JCHAIN     | No KO | -6.33214 | 7.069047 | 9.165493 | 0.002467 | 0.37908  |             |           | MARCO    | K13884 | -9.61217 | 3.671977 | 7.602201 | 0.005831 | 0.419336 |
| NGP        | No KO | -5.5637  | 7.012403 | 7.61691  | 0.005784 | 0.468096 | neutrophili | LOC110217 | KLHL33   | K13957 | -10.8743 | 3.241012 | 8.00135  | 0.004675 | 0.406923 |
| VSIR       | No KO | -5.54128 | 7.803693 | 8.287248 | 0.003993 | 0.405219 |             |           | MOV10L1  | K13983 | -11.0496 | 3.430699 | 8.572225 | 0.003414 | 0.385571 |
| RIN3       | No KO | -5.48938 | 7.723385 | 8.180555 | 0.004235 | 0.409656 |             |           | IFIT1    | K14217 | 6.434765 | 9.145091 | 10.82403 | 0.001002 | 0.268071 |
| TMEM140    | No KO | -5.47182 | 7.270937 | 7.665994 | 0.005628 | 0.467981 |             |           | SCRN1    | K14358 | -11.9041 | 4.196736 | 12.007   | 0.00053  | 0.212066 |
| IFIT3      | No KO | -5.14017 | 10.59581 | 8.826321 | 0.00297  | 0.383229 | interferon- | LOC110195 | SLC5A10  | K14390 | -10.3986 | 2.706923 | 6.803952 | 0.009097 | 0.467943 |
| TENM4      | No KO | 5.420449 | 5.556261 | 8.983661 | 0.002725 | 0.379163 |             |           | SULF1    | K14607 | -10.62   | 3.026472 | 7.371534 | 0.006628 | 0.442037 |
| CFAP46     | No KO | 5.50601  | 5.085559 | 7.881622 | 0.004995 | 0.438187 |             |           | CUBN     | K14616 | -11.313  | 3.68295  | 9.44635  | 0.002116 | 0.327986 |
| FAM71A     | No KO | 5.558894 | 7.594589 | 14.17268 | 0.000167 | 0.151282 | protein FAI | LOC110204 | SLC26A10 | K14707 | -8.58098 | 4.157284 | 7.528525 | 0.006074 | 0.423549 |
| WDR87      | No KO | 6.02977  | 5.886801 | 11.63799 | 0.000646 | 0.219761 | WD repeat   | LOC110215 | SLC9A2   | K14722 | -10.2032 | 3.061236 | 7.064413 | 0.007865 | 0.451199 |
| ERIC3      | No KO | 6.145232 | 4.924893 | 8.833914 | 0.002958 | 0.383229 |             |           | SHANK1   | K15009 | -8.07582 | 4.25931  | 7.638572 | 0.005715 | 0.419336 |
| ZNF608     | No KO | 6.159619 | 4.509178 | 7.661862 | 0.005641 | 0.467981 |             |           | PIF1     | K15255 | -10.1662 | 2.761133 | 6.656028 | 0.009884 | 0.486922 |
| ZNF536     | No KO | 6.295053 | 4.7862   | 8.6215   | 0.003323 | 0.385212 |             |           | MUC16    | K16145 | -9.46589 | 5.739134 | 15.55283 | 8.03E-05 | 0.064225 |
| NYAP1      | No KO | 6.316053 | 4.37737  | 7.579395 | 0.005905 | 0.469552 |             |           | TIMP1    | K16451 | 5.603382 | 6.793091 | 7.120887 | 0.007621 | 0.448864 |
| FAM71B     | No KO | 6.380576 | 6.228985 | 13.85221 | 0.000198 | 0.157612 | protein FAI | LOC110195 | PCNT     | K16481 | -10.6052 | 2.884832 | 7.13237  | 0.007572 | 0.448864 |
| LRR1Q1     | No KO | 6.742808 | 4.141553 | 7.525461 | 0.006085 | 0.478223 |             |           | PCNT     | K16481 | -10.5634 | 2.955615 | 7.198239 | 0.007299 | 0.446821 |
| GRID2IP    | No KO | 6.789374 | 4.622525 | 9.258852 | 0.002344 | 0.37908  |             |           | STARD9   | K16491 | -6.71301 | 5.720607 | 10.17083 | 0.001427 | 0.308056 |
| FBN3       | No KO | 7.626735 | 4.07851  | 8.662845 | 0.003249 | 0.385212 |             |           | PCDHGA2  | K16495 | -4.34717 | 7.034222 | 6.963817 | 0.008319 | 0.466414 |
| NAV3       | No KO | 7.739044 | 4.154658 | 9.12797  | 0.002518 | 0.37908  |             |           | PCDHGA5  | K16495 | -10.3774 | 3.339566 | 7.722799 | 0.005454 | 0.419336 |
| DNHD1      | No KO | 7.90526  | 4.48602  | 10.94022 | 0.000941 | 0.271327 |             |           | CDHR1    | K16501 | -11.0073 | 3.625938 | 8.98048  | 0.00273  | 0.360335 |
| RIMBP3     | No KO | 8.402338 | 4.53588  | 11.94037 | 0.00055  | 0.213505 | RIMS-bindi  | LOC110215 | CDHR5    | K16505 | -10.8148 | 4.331034 | 11.09964 | 0.000864 | 0.255336 |
| MPP2       | No KO | 8.57907  | 3.390567 | 7.953828 | 0.0048   | 0.437504 |             |           | PTPRG    | K16667 | -6.71437 | 4.564771 | 6.880804 | 0.008714 | 0.466956 |
| PLEKHH1    | No KO | 8.695365 | 3.605264 | 8.631529 | 0.003305 | 0.385212 |             |           | TMIGD2   | K16668 | -10.041  | 3.177634 | 7.116076 | 0.007641 | 0.448864 |
| GULP1      | No KO | 8.945499 | 4.81894  | 13.95326 | 0.000188 | 0.157612 |             |           | MAP7D3   | K16807 | -14.3824 | 11.30695 | 46.92664 | 7.42E-12 | 8.4E-08  |
| ZNF260     | No KO | 9.075333 | 3.231609 | 8.100176 | 0.004427 | 0.418032 | zinc finger | LOC110197 | ANKRD7   | K17299 | -6.92518 | 4.964037 | 8.25072  | 0.004075 | 0.405415 |
| FAM170B    | No KO | 9.190228 | 5.051315 | 15.09101 | 0.000103 | 0.126737 | protein FAI | LOC110206 | SPRY4    | K17385 | -11.8132 | 4.06703  | 11.34409 | 0.000757 | 0.255336 |
| TOGARAM    | No KO | 9.413404 | 3.416258 | 8.990855 | 0.002714 | 0.379163 |             |           | SYTL3    | K17598 | -10.2396 | 3.772889 | 8.528402 | 0.003497 | 0.385571 |
| FBN2       | No KO | 9.500202 | 2.456688 | 7.495375 | 0.006187 | 0.483483 | fibrillin-2 | LOC110195 | RGL1     | K17635 | -10.3775 | 3.284691 | 7.616784 | 0.005784 | 0.419336 |
| ZNF345     | No KO | 9.530034 | 3.508573 | 9.394782 | 0.002177 | 0.37908  | zinc finger | LOC110221 | ACOD1    | K17724 | 5.393933 | 10.89394 | 9.281219 | 0.002316 | 0.334232 |
| VSTM5      | No KO | 9.787616 | 2.601655 | 7.934047 | 0.004852 | 0.437504 |             |           | TNS4     | K18080 | -10.7009 | 3.214457 | 7.788812 | 0.005258 | 0.419336 |
| CCDC87     | No KO | 9.823856 | 2.543507 | 7.919803 | 0.004891 | 0.437504 |             |           | CRYM     | K18258 | -11.411  | 3.666987 | 9.512752 | 0.002041 | 0.327986 |
| BPIFB4     | No KO | 9.917627 | 2.442565 | 7.928192 | 0.004868 | 0.437504 | BPI fold-co | LOC110211 | NEB      | K18267 | -9.05175 | 5.169835 | 12.3032  | 0.000452 | 0.186413 |
| CFAP54     | No KO | 10.00896 | 3.989681 | 11.80102 | 0.000592 | 0.217654 |             |           | TDRD6    | K18405 | -12.5602 | 4.870736 | 16.10661 | 5.99E-05 | 0.062065 |
| MRO        | No KO | 10.12587 | 3.410959 | 9.713684 | 0.00183  | 0.364531 |             |           | PDE8B    | K18437 | -11.8518 | 4.301344 | 12.41021 | 0.000427 | 0.181531 |
| CFAP206    | No KO | 10.31124 | 2.727594 | 8.634182 | 0.0033   | 0.385212 |             |           | ANLN     | K18621 | -7.83485 | 4.336163 | 7.583445 | 0.005892 | 0.419336 |
| CAMK2N2    | No KO | 10.32833 | 2.697872 | 8.634658 | 0.003299 | 0.385212 |             |           | SUN2     | K19347 | -7.08987 | 5.271254 | 8.917973 | 0.002825 | 0.365774 |
| LRRC7      | No KO | 10.34391 | 3.384159 | 9.936499 | 0.001621 | 0.34437  |             |           | ART5     | K19977 | -11.0274 | 4.070246 | 10.37264 | 0.001279 | 0.289949 |
| MATN1      | No KO | 10.44252 | 3.018781 | 9.21761  | 0.002398 | 0.37908  |             |           | LRP1B    | K20049 | -10.3058 | 4.677622 | 11.85013 | 0.000577 | 0.224102 |
| LDLRAD2    | No KO | 10.50436 | 2.921537 | 9.07921  | 0.002586 | 0.37908  |             |           | LRP4     | K20051 | -6.16254 | 5.142962 | 7.433858 | 0.006402 | 0.439648 |
| CD164L2    | No KO | 10.59915 | 3.11102  | 9.611303 | 0.001934 | 0.375761 |             |           | DOK2     | K20234 | -7.76728 | 4.170703 | 6.933181 | 0.008463 | 0.466414 |
| KY         | No KO | 10.75286 | 3.070436 | 9.703074 | 0.00184  | 0.364531 |             |           | ARHGAP21 | K20315 | -5.4399  | 5.667789 | 7.370105 | 0.006633 | 0.442037 |
|            |       |          |          |          |          |          | RNA-rho G'  | LOC110204 |          |        |          |          |          |          | 120      |

|         |       |          |          |          |          |          |             |            |          |          |          |          |          |            |              |
|---------|-------|----------|----------|----------|----------|----------|-------------|------------|----------|----------|----------|----------|----------|------------|--------------|
| UNC5CL  | No KO | 10.80247 | 3.242965 | 10.17544 | 0.001424 | 0.335524 | ARHGAP21    | K20315     | -10.5633 | 3.017187 | 7.305409 | 0.006876 | 0.442037 | rho GTPase | LOC110220892 |
| WFIKKN1 | No KO | 10.83212 | 3.08214  | 9.826686 | 0.001721 | 0.354467 | SEC16B      | K20353     | -10.4106 | 3.063634 | 7.252114 | 0.007083 | 0.442037 |            |              |
| ZNF474  | No KO | 11.58483 | 4.357143 | 15.78719 | 7.09E-05 | 0.107177 | zinc finger | LOC1102223 | -10.8912 | 3.227941 | 7.992382 | 0.004699 | 0.406923 |            |              |
|         |       |          |          |          |          |          | ARHGAP28    | K20639     | -10.3782 | 2.996632 | 7.108542 | 0.007673 | 0.448864 |            |              |
|         |       |          |          |          |          |          | ECT2        | K20704     | -10.3262 | 4.546403 | 11.17547 | 0.000829 | 0.255336 |            |              |
|         |       |          |          |          |          |          | PANX2       | K20857     | -8.45812 | 4.911816 | 9.911334 | 0.001643 | 0.31032  |            |              |
|         |       |          |          |          |          |          | NLRP1       | K20865     | -11.0496 | 3.393647 | 8.4895   | 0.003573 | 0.385571 |            |              |
|         |       |          |          |          |          |          | ANTXRL      | K20909     | -6.89679 | 4.766919 | 7.660742 | 0.005645 | 0.419336 |            |              |
|         |       |          |          |          |          |          | NOTCH4      | K20996     | -6.45417 | 4.740078 | 6.933157 | 0.008463 | 0.466414 |            |              |
|         |       |          |          |          |          |          | MUC5AC      | K21125     | 5.513959 | 6.660558 | 6.611097 | 0.010136 | 0.489235 | cytochrom  | LOC110203146 |
|         |       |          |          |          |          |          | CYBB        | K21421     | -10.8741 | 3.356134 | 8.236469 | 0.004107 | 0.405415 |            |              |
|         |       |          |          |          |          |          | USH1G       | K21878     | -10.5622 | 3.492556 | 8.219863 | 0.004144 | 0.405415 |            |              |
|         |       |          |          |          |          |          | FAM20C      | K21958     | -10.896  | 3.937208 | 9.765941 | 0.001778 | 0.313216 |            |              |
|         |       |          |          |          |          |          | UNC45B      | K21991     | -11.1966 | 3.449487 | 8.762574 | 0.003076 | 0.378659 |            |              |
|         |       |          |          |          |          |          | MYRIP       | K22237     | -10.8742 | 3.290547 | 8.098568 | 0.004431 | 0.406923 |            |              |
|         |       |          |          |          |          |          | CLSTN3      | K22661     | -10.3453 | 2.780146 | 6.820011 | 0.009016 | 0.467327 |            |              |
|         |       |          |          |          |          |          | KANK3       | K22808     | -12.0194 | 4.347647 | 12.86554 | 0.000335 | 0.169623 |            |              |
|         |       |          |          |          |          |          | GPR179      | K22961     | -10.3557 | 2.620757 | 6.697845 | 0.009655 | 0.482388 |            |              |
|         |       |          |          |          |          |          | UCN         | K23142     | -7.04819 | 4.356282 | 6.700359 | 0.009641 | 0.482388 |            |              |
|         |       |          |          |          |          |          | PMFBP1      | K23223     | -10.8132 | 3.106845 | 7.693638 | 0.005543 | 0.419336 |            |              |
|         |       |          |          |          |          |          | CUNH16orf1  | N/A        | -11.5356 | 3.930852 | 10.50239 | 0.001193 | 0.282938 |            |              |
|         |       |          |          |          |          |          | CUNH16orf2  | N/A        | -9.3884  | 4.701689 | 10.61902 | 0.00112  | 0.271882 |            |              |
|         |       |          |          |          |          |          | CUNH1orf1   | N/A        | -10.5135 | 2.924996 | 7.104216 | 0.007692 | 0.448864 |            |              |
|         |       |          |          |          |          |          | CUNH8orf2   | N/A        | -14.2042 | 6.484914 | 28.63376 | 8.77E-08 | 0.000298 | Pseudo     | LOC110220304 |
|         |       |          |          |          |          |          | Pseudo      | N/A        | -11.288  | 3.691364 | 9.440864 | 0.002123 | 0.327986 | Pseudo     | LOC110220742 |
|         |       |          |          |          |          |          | Pseudo      | N/A        | -11.278  | 3.745321 | 9.59484  | 0.001952 | 0.32366  | Pseudo     | LOC110195951 |
|         |       |          |          |          |          |          | Pseudo      | N/A        | -11.2229 | 4.844789 | 13.7742  | 0.000206 | 0.12195  | Pseudo     | LOC110215492 |
|         |       |          |          |          |          |          | Pseudo      | N/A        | -10.9854 | 3.819205 | 9.497281 | 0.002058 | 0.327986 | Pseudo     | LOC110213973 |
|         |       |          |          |          |          |          | Pseudo      | N/A        | -10.8023 | 3.320226 | 8.091237 | 0.004449 | 0.406923 | Pseudo     | LOC110199229 |
|         |       |          |          |          |          |          | Pseudo      | N/A        | -10.7064 | 3.834606 | 9.227502 | 0.002385 | 0.334293 | Pseudo     | LOC110199404 |
|         |       |          |          |          |          |          | Pseudo      | N/A        | -10.6745 | 3.134749 | 7.615834 | 0.005787 | 0.419336 | Pseudo     | LOC110197170 |
|         |       |          |          |          |          |          | Pseudo      | N/A        | -10.5333 | 3.368135 | 7.93101  | 0.004861 | 0.410497 | Pseudo     | LOC110223090 |
|         |       |          |          |          |          |          | Pseudo      | N/A        | -10.0469 | 2.790403 | 6.581158 | 0.010308 | 0.49007  | Pseudo     | LOC110223369 |
|         |       |          |          |          |          |          | Pseudo      | N/A        | -9.87907 | 4.189003 | 9.151818 | 0.002485 | 0.341365 | Pseudo     | LOC110203424 |
|         |       |          |          |          |          |          | Pseudo      | N/A        | -9.86663 | 3.953852 | 8.595784 | 0.00337  | 0.385571 | Pseudo     | LOC110194165 |
|         |       |          |          |          |          |          | Pseudo      | N/A        | -9.4871  | 4.276046 | 9.246812 | 0.00236  | 0.334232 | Pseudo     | LOC110218211 |
|         |       |          |          |          |          |          | Pseudo      | N/A        | -8.72185 | 4.398933 | 7.704993 | 0.005508 | 0.419336 | Pseudo     | LOC110210617 |
|         |       |          |          |          |          |          | Pseudo      | N/A        | -8.20258 | 4.630274 | 9.096691 | 0.002562 | 0.34484  | Pseudo     | LOC110203563 |
|         |       |          |          |          |          |          | Pseudo      | N/A        | -6.66947 | 8.183468 | 15.3299  | 9.03E-05 | 0.068249 | Pseudo     | LOC110204714 |
|         |       |          |          |          |          |          | Pseudo      | N/A        | -5.95065 | 5.65995  | 8.299593 | 0.003966 | 0.4019   | Pseudo     | LOC110223355 |
|         |       |          |          |          |          |          | Pseudo      | N/A        | 5.17847  | 8.098983 | 7.555806 | 0.005983 | 0.419336 | Pseudo     | LOC110211833 |
|         |       |          |          |          |          |          | uncharacte  | N/A        | -16.7526 | 9.003446 | 45.9266  | 1.24E-11 | 8.4E-08  | uncharacte | LOC110204397 |
|         |       |          |          |          |          |          | uncharacte  | N/A        | -16.4426 | 8.700448 | 44.13776 | 3.08E-11 | 1.4E-07  | uncharacte | LOC110204395 |
|         |       |          |          |          |          |          | uncharacte  | N/A        | -12.723  | 5.138558 | 17.72914 | 2.55E-05 | 0.043335 | uncharacte | LOC110203791 |

|                |          |          |          |          |          |              |              |
|----------------|----------|----------|----------|----------|----------|--------------|--------------|
| uncharacte N/A | -11.5393 | 3.979246 | 10.67878 | 0.001084 | 0.269878 | uncharacte   | LOC110220800 |
| uncharacte N/A | -11.4755 | 3.791218 | 9.960619 | 0.0016   | 0.31032  | uncharacte   | LOC110195385 |
| uncharacte N/A | -11.3071 | 3.613685 | 9.268179 | 0.002332 | 0.334232 | uncharacte   | LOC110222943 |
| uncharacte N/A | -11.0296 | 3.422315 | 8.536557 | 0.003482 | 0.385571 | uncharacte   | LOC110207231 |
| uncharacte N/A | -10.9294 | 3.452057 | 8.501652 | 0.003549 | 0.385571 | uncharacte   | LOC110221959 |
| uncharacte N/A | -10.7934 | 3.4315   | 8.322209 | 0.003917 | 0.400483 | uncharacte   | LOC110202211 |
| uncharacte N/A | -10.6742 | 3.283771 | 7.895776 | 0.004956 | 0.410738 | uncharacte   | LOC110211369 |
| uncharacte N/A | -10.6291 | 2.936832 | 7.22657  | 0.007185 | 0.442037 | uncharacte   | LOC110211753 |
| uncharacte N/A | -10.3112 | 2.727299 | 6.747683 | 0.009389 | 0.476333 | uncharacte   | LOC110201453 |
| uncharacte N/A | -10.1664 | 2.622687 | 6.544966 | 0.01052  | 0.491544 | uncharacte   | LOC110202919 |
| uncharacte N/A | -10.1663 | 2.685533 | 6.594896 | 0.010229 | 0.489235 | uncharacte   | LOC110220146 |
| uncharacte N/A | -8.90348 | 3.696645 | 6.895799 | 0.008641 | 0.466956 | uncharacte   | LOC110203721 |
| uncharacte N/A | -7.72141 | 4.357199 | 6.761078 | 0.009318 | 0.474542 | uncharacte   | LOC110192933 |
| uncharacte N/A | -7.48149 | 4.666827 | 7.999286 | 0.004681 | 0.406923 | uncharacte   | LOC110218577 |
| uncharacte N/A | -7.12177 | 4.576328 | 7.255015 | 0.007072 | 0.442037 | uncharacte   | LOC110207158 |
| uncharacte N/A | -7.07858 | 4.547116 | 6.835509 | 0.008938 | 0.466956 | uncharacte   | LOC110219148 |
| uncharacte N/A | -6.82099 | 5.12833  | 8.57596  | 0.003407 | 0.385571 | uncharacte   | LOC110217275 |
| uncharacte N/A | -6.22039 | 5.575924 | 8.739342 | 0.003115 | 0.378659 | uncharacte   | LOC110204294 |
| uncharacte N/A | 5.510721 | 8.072795 | 8.17877  | 0.004239 | 0.406923 | uncharacte   | LOC110213904 |
| uncharacte N/A | 6.671029 | 5.94936  | 7.294007 | 0.00692  | 0.442037 | uncharacte   | LOC110214822 |
| ADAMTSL1 no KO | -7.91445 | 4.170084 | 7.191079 | 0.007328 | 0.446821 |              |              |
| ALS2CR12 no KO | -11.3964 | 3.823152 | 9.975735 | 0.001587 | 0.31032  |              |              |
| Bf-CRAMP no KO | 6.731994 | 11.02452 | 12.80191 | 0.000346 | 0.169623 | cathelicidin | LOC110216987 |
| BHMG1 no KO    | -8.61239 | 4.384852 | 8.679784 | 0.003219 | 0.38183  |              |              |
| CCDC136 no KO  | -8.96344 | 4.12811  | 8.134956 | 0.004343 | 0.406923 |              |              |
| CCDC96 no KO   | -10.3631 | 2.751643 | 6.815377 | 0.009039 | 0.467327 |              |              |
| CCIN no KO     | -10.3109 | 2.9252   | 6.931053 | 0.008473 | 0.466414 |              |              |
| CFAP46 no KO   | -7.40658 | 5.085559 | 9.405964 | 0.002164 | 0.328202 |              |              |
| CFAP54 no KO   | -11.7399 | 3.989681 | 10.96027 | 0.000931 | 0.268071 |              |              |
| CLRN3 no KO    | -10.1663 | 2.684418 | 6.594003 | 0.010234 | 0.489235 |              |              |
| CMTM7 no KO    | -10.3449 | 2.991085 | 7.070247 | 0.007839 | 0.451199 |              |              |
| CMYA5 no KO    | -5.89817 | 5.590931 | 8.121263 | 0.004376 | 0.406923 |              |              |
| CPAMD8 no KO   | -7.52061 | 4.693654 | 8.351595 | 0.003855 | 0.399392 |              |              |
| DCDC1 no KO    | -10.4731 | 3.294787 | 7.725988 | 0.005444 | 0.419336 | doublecortin | LOC110192597 |
| DNHD1 no KO    | -12.2268 | 4.48602  | 13.87451 | 0.000196 | 0.120867 |              |              |
| FAM71A no KO   | -8.66611 | 7.594589 | 20.80486 | 5.09E-06 | 0.011541 | protein FAI  | LOC110204398 |
| FAM71B no KO   | -10.6184 | 6.228985 | 20.12955 | 7.25E-06 | 0.014076 | protein FAI  | LOC110193420 |
| FRMPD2 no KO   | -8.36755 | 4.197782 | 7.710604 | 0.005491 | 0.419336 |              |              |
| FRMPD4 no KO   | -12.5219 | 4.833198 | 15.85931 | 6.83E-05 | 0.062065 |              |              |
| GPM6B no KO    | -8.00933 | 4.655692 | 8.429686 | 0.003692 | 0.392234 |              |              |
| GRIA1 no KO    | -6.46868 | 4.850723 | 6.663412 | 0.009843 | 0.486672 |              |              |
| HAVCR2 no KO   | 5.972461 | 6.930189 | 7.937212 | 0.004844 | 0.410497 |              |              |
| IFIT3 no KO    | 4.705312 | 10.59581 | 7.562566 | 0.005961 | 0.419336 | interferon-  | LOC110198959 |
| ITIH4 no KO    | -9.45649 | 3.782194 | 7.414418 | 0.006472 | 0.442037 | inter-alpha  | LOC110197543 |

|           |       |          |          |          |          |          |                           |
|-----------|-------|----------|----------|----------|----------|----------|---------------------------|
| KIAA1324L | no KO | -9.48406 | 3.392233 | 6.620829 | 0.010081 | 0.489235 |                           |
| KIAA1755  | no KO | -11.3297 | 3.915538 | 10.20646 | 0.0014   | 0.307035 |                           |
| LOXHD1    | no KO | -11.2781 | 3.697293 | 9.447058 | 0.002116 | 0.327986 | lipoxygena LOC110221375   |
| LTF       | no KO | 5.117372 | 8.836033 | 7.860398 | 0.005054 | 0.413981 | lactotransf LOC110208182  |
| MEGF11    | no KO | -10.6813 | 4.450572 | 11.34412 | 0.000757 | 0.255336 |                           |
| PATL2     | no KO | -5.95388 | 5.301088 | 7.241959 | 0.007123 | 0.442037 |                           |
| PLAC8     | no KO | 7.620532 | 7.04413  | 10.48047 | 0.001207 | 0.282938 |                           |
| PLEKHA4   | no KO | -11.4599 | 3.875321 | 10.22231 | 0.001388 | 0.307035 |                           |
| PLEKHO1   | no KO | -10.3108 | 2.982331 | 7.026015 | 0.008035 | 0.457118 |                           |
| PRR36     | no KO | -8.69798 | 3.879898 | 6.799496 | 0.00912  | 0.467943 | proline-rici LOC110196988 |
| PRR5L     | no KO | -11.7911 | 4.396486 | 12.77812 | 0.000351 | 0.169623 |                           |
| PRX       | no KO | -9.24645 | 3.688987 | 7.064475 | 0.007864 | 0.451199 |                           |
| PTCHD3    | no KO | -10.239  | 3.388834 | 7.686118 | 0.005566 | 0.419336 |                           |
| RCOR2     | no KO | -10.5342 | 2.938835 | 7.144318 | 0.007522 | 0.448864 |                           |
| RETN      | no KO | 12.5698  | 6.068172 | 12.66811 | 0.000372 | 0.169623 |                           |
| SAMSN1    | no KO | -4.90184 | 5.975463 | 6.548104 | 0.010501 | 0.491544 |                           |
| SCHIP1    | no KO | -10.4736 | 3.040705 | 7.267884 | 0.007021 | 0.442037 | schwannor LOC110210081    |
| SLITRK5   | no KO | -10.7012 | 3.060568 | 7.504239 | 0.006157 | 0.427108 |                           |
| SMOC2     | no KO | -10.599  | 3.180858 | 7.632065 | 0.005735 | 0.419336 |                           |
| SYNDIG1   | no KO | -10.592  | 2.985742 | 7.275317 | 0.006992 | 0.442037 |                           |
| TCF23     | no KO | -10.5331 | 3.439009 | 8.077474 | 0.004483 | 0.406923 |                           |
| TENM4     | no KO | -13.2446 | 5.556261 | 21.10683 | 4.35E-06 | 0.011541 |                           |
| TEX15     | no KO | -11.5791 | 3.984833 | 10.747   | 0.001045 | 0.268071 |                           |
| TLCD2     | no KO | -10.4928 | 4.195124 | 9.982423 | 0.001581 | 0.31032  |                           |
| TRIL      | no KO | -10.5319 | 3.860822 | 9.105959 | 0.002549 | 0.34484  |                           |
| TTC25     | no KO | -7.07575 | 4.875089 | 8.232225 | 0.004116 | 0.405415 |                           |
| UNC80     | no KO | -6.86453 | 4.385237 | 6.592178 | 0.010245 | 0.489235 |                           |
| WDR87     | no KO | -9.75705 | 5.886801 | 16.83076 | 4.09E-05 | 0.050562 | WD repeat LOC110219911    |
| WDR93     | no KO | -10.047  | 2.7732   | 6.567298 | 0.010389 | 0.490976 |                           |
| WFIKKN1   | no KO | -10.8321 | 3.08214  | 7.660905 | 0.005644 | 0.419336 |                           |
| XIRP2     | no KO | -11.7023 | 4.134975 | 11.47839 | 0.000704 | 0.255336 |                           |
| ZCCHC24   | no KO | -10.1664 | 2.648606 | 6.565464 | 0.010399 | 0.490976 |                           |
| ZNF469    | no KO | -7.83261 | 5.753497 | 12.55208 | 0.000396 | 0.173685 |                           |
