# Supplementary material for: Antibiotic treatment of Chlamydia-induced cystitis in the koala is linked to expression of key inflammatory genes in reactive oxygen pathways
Source: PLoS One. 2019 Aug 15;14(8):e0221109. doi: 10.1371/journal.pone.0221109 (PMC6695219; doi:10.1371/journal.pone.0221109)
Supplement: S1 Table — (PDF) [file pone.0221109.s002.pdf]

| Test                             | Week     | Urine absorbance at tail stump (mm) | Diamator of wet patch (cm) | Bladder wall Thickness (mm) | De-hydration (%) | Body Condition Score (1 -10) | C. pecorum - Ocular (copies/swab) | C. pecorum - Rectal (copies/swab) | C. pecorum - Urogenital (copies/swab) |
|----------------------------------|----------|-------------------------------------|----------------------------|-----------------------------|------------------|------------------------------|-----------------------------------|-----------------------------------|---------------------------------------|
| Male Koala 1 (Doxycycline)       | Baseline | 1.5                                 | 14                         | 27                          | 0                | 6                            | 0                                 | 0                                 | 1.37E+06                              |
|                                  | Week 2   | 4                                   | 17                         | 47                          | 0                | 5                            | 0                                 | 0                                 | 0                                     |
|                                  | Week 4   | 0                                   | 14                         | 22                          | 0                | 5                            | 0                                 | 0                                 | 0                                     |
|                                  | Week 6   | 0                                   | 14                         | 35                          | 0                | 7                            | 0                                 | 0                                 | 0                                     |
|                                  | Week 8   | 0                                   | 0                          | 18                          | 0                | 6                            | 0                                 | 0                                 | 0                                     |
| Male koala 2 (Doxycycline)       | Baseline | 2                                   | 16                         | 16                          | 5                | 5                            | 5.16E+04                          | 0                                 | 9.12E+03                              |
|                                  | Week 2   | 2                                   | 12                         | 30                          | 0                | 5                            | 0                                 | 0                                 | 0                                     |
|                                  | Week 4   | 5                                   | 17                         | 22                          | 2                | 4                            | 0                                 | 0                                 | 0                                     |
|                                  | Week 6   | 0                                   | 4                          | 15                          | 10               | 3                            | 0                                 | 0                                 | 0                                     |
|                                  | Week 8   | N/A                                 | N/A                        | N/A                         | N/A              | N/A                          | N/A                               | N/A                               | N/A                                   |
| Female koala 1 (Doxycycline)     | Baseline | 7                                   | 10                         | 26                          | 10               | 7                            | 8.43E+05                          | 6.78E+04                          | 4.70E+05                              |
|                                  | Week 2   | 0                                   | 6                          | 28                          | 0                | 7                            | 2.33E+04                          | 0                                 | 8.75E+03                              |
|                                  | Week 4   | 0                                   | 0                          | 17                          | 0                | 6                            | 1.25E+05                          | 3.13E+04                          | 1.53E+04                              |
|                                  | Week 6   | 0                                   | 0                          | 18                          | 0                | 7                            | 7.37E+03                          | 3.36E+03                          | 3.67E+03                              |
|                                  | Week 8   | 0                                   | 0                          | 22                          | 0                | 7                            | 0                                 | 0                                 | 0                                     |
| Female koala 2 (Chloramphenicol) | Baseline | 0                                   | 10                         | 13                          | 5                | 8                            | 3.07E+04                          | 1.49E+07                          | 4.65E+07                              |
|                                  | Week 2   | 0                                   | 0                          | 31                          | 5                | 7                            | 0                                 | 0                                 | 0                                     |
|                                  | Week 4   | 0                                   | 0                          | 18                          | 0                | 6                            | 0                                 | 0                                 | 0                                     |
|                                  | Week 6   | 0                                   | 0                          | 20                          | 10               | 7                            | 0                                 | 0                                 | 0                                     |
|                                  | Week 8   | 0                                   | 0                          | 16                          | 0                | 6                            | 0                                 | 0                                 | 0                                     |
| Female koala 3 (Doxycycline)     | Baseline | 5                                   | 16                         | 70                          | 10               | 6                            | 0                                 | 0                                 | 2.72E+05                              |
|                                  | Week 2   | Not taken                           | 17                         | 18                          | 5                | 4                            | 0                                 | 0                                 | 0                                     |
|                                  | Week 4   | N/A                                 | N/A                        | N/A                         | N/A              | N/A                          | N/A                               | N/A                               | N/A                                   |
|                                  | Week 6   | N/A                                 | N/A                        | N/A                         | N/A              | N/A                          | N/A                               | N/A                               | N/A                                   |
|                                  | Week 8   | N/A                                 | N/A                        | N/A                         | N/A              | N/A                          | N/A                               | N/A                               | N/A                                   |
